# Supplementary material for: Synthesis of carboxylic group functionalized mesoporous silicas (CFMSs) with various structures
Source: Royal Society of Chemistry journal article supplement (doi:10.1039/b615209k), 2007-01-01
Supplement: b615209k.pdf [file b615209k.pdf]

**Supporting Information for:**

**Synthesis of Carboxylic Group Functionalized Mesoporous Silicas (CFMSs) with Various Structures**

Lu Han,<sup>a</sup> Yasuhiro Sakamoto,<sup>\*b</sup> Osamu Terasaki,<sup>b</sup> Yongsheng Li<sup>a</sup> and Shunai Che<sup>\*a</sup>

Supporting Information 1:

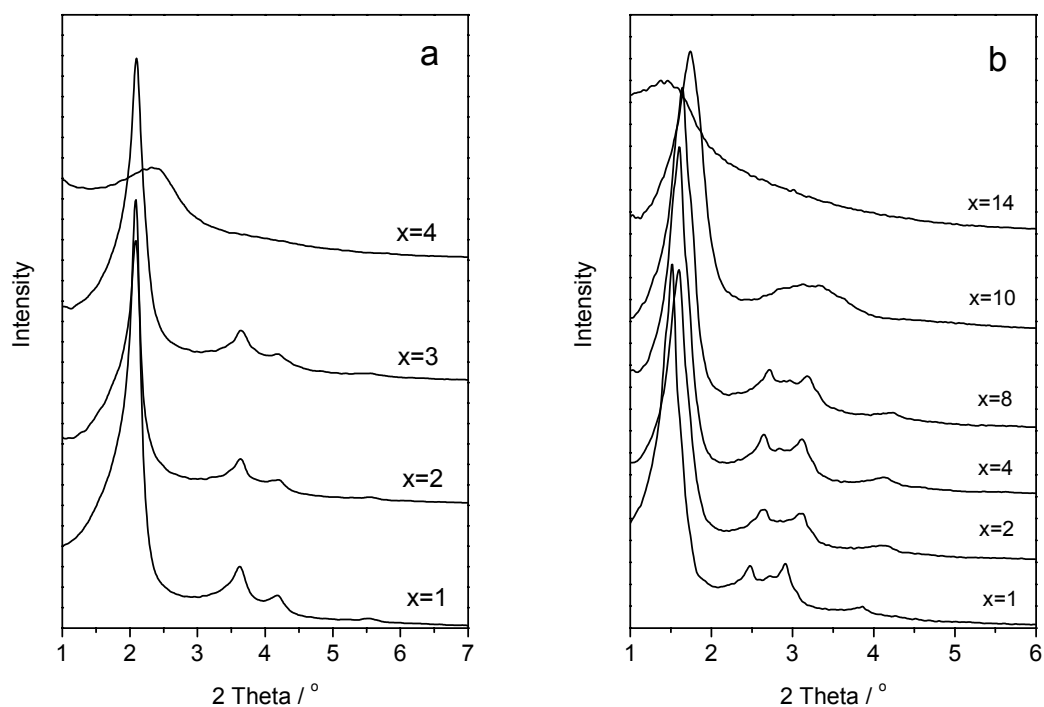

**Fig. S1** XRD patterns of extracted CFMSs by using CTAB and C<sub>18-3-1</sub> as template. The chemical molar composition of the reaction mixture was as follows. (a) CTAB:CES:TEOS:H<sub>2</sub>O 1:x:7:2000, (b) C<sub>18-3-1</sub>:CES:TEOS:H<sub>2</sub>O 1:x:15:2000.

Supporting Information 2:

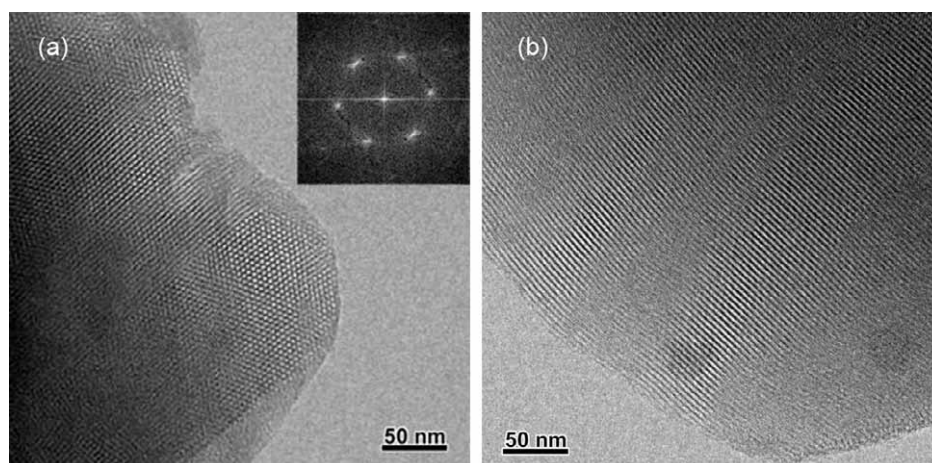

**Fig. S2** HRTEM images and Fourier diffractograms of the extracted CFMSs by using CTAB as template, the molar composition of this sample was CTAB:CES:TEOS:H<sub>2</sub>O 1:1:7:2000 (space group  $p6mm$ )

Supporting Information 3:

**Fig. S3** Nitrogen adsorption-desorption isotherm and corresponding pore size distribution curves of the extracted samples shown in Fig. S1a

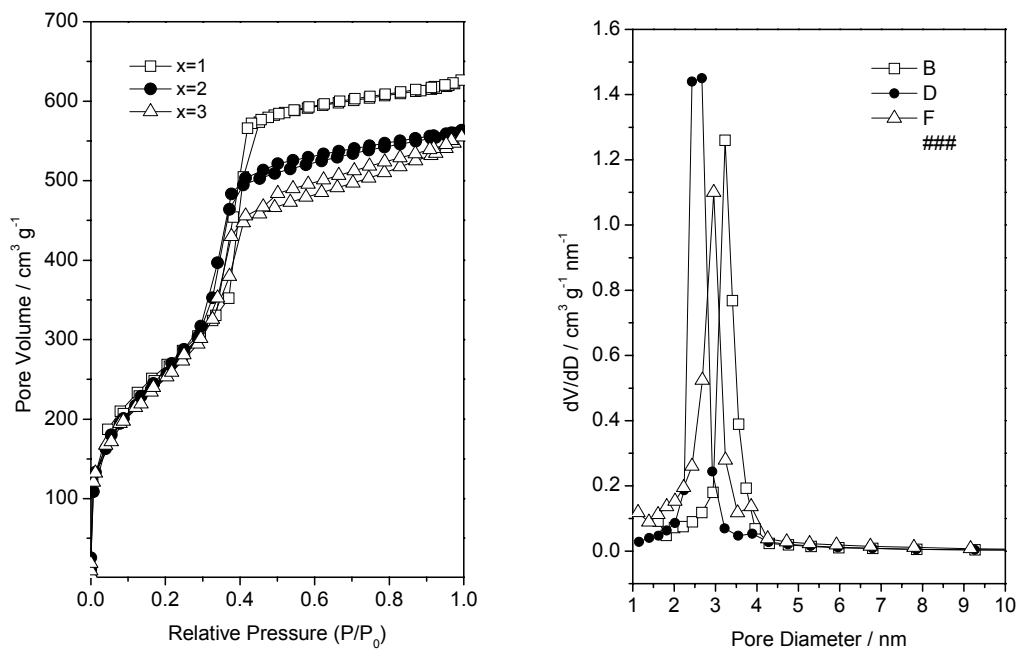

**Table S1.** Surface area, pore volume and pore diameter data.

| CES/CTAB (mol) | Surface Area (m <sup>2</sup> g <sup>-1</sup> ) | Pore Volume (cm <sup>3</sup> g <sup>-1</sup> ) | Pore Diameter (nm) |
|----------------|------------------------------------------------|------------------------------------------------|--------------------|
| x=1            | 973.98                                         | 1.08                                           | 3.23               |
| x=2            | 1014.82                                        | 1.03                                           | 2.92               |
| x=3            | 976.88                                         | 0.99                                           | 2.96               |

Supporting Information 4:

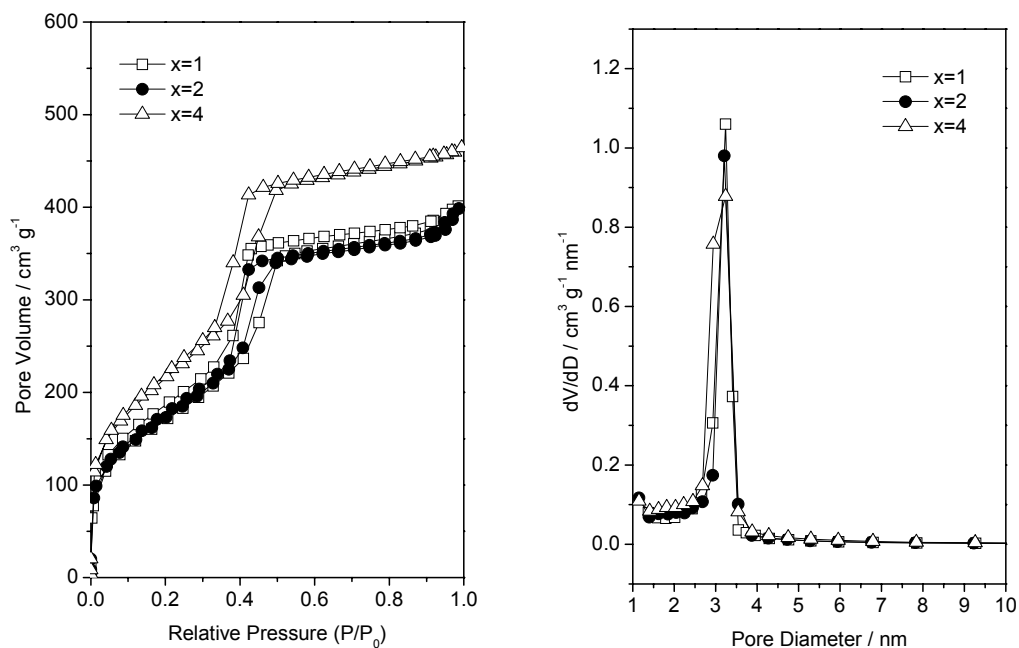

**Fig. S4** Nitrogen adsorption-desorption isotherm and corresponding pore size distribution curves of the extracted samples shown in Fig. S1b

**Table S2.** Surface area, pore volume and pore diameter data.

| CES/C <sub>18-3-1</sub> (mol) | Surface Area (m <sup>2</sup> g <sup>-1</sup> ) | Pore Volume (cm <sup>3</sup> g <sup>-1</sup> ) | Pore Diameter (nm) |
|-------------------------------|------------------------------------------------|------------------------------------------------|--------------------|
| x=1                           | 622.86                                         | 0.65                                           | 3.24               |
| x=2                           | 635.71                                         | 0.69                                           | 3.21               |
| x=4                           | 791.16                                         | 0.80                                           | 3.24               |
